# Supplementary material for: HazMapper: a global open-source natural hazard mapping application in Google Earth Engine
Source: Copernicus journal article supplement (doi:10.5194/nhess-21-1495-2021), 2021-05-12
Supplement: Supplementary file [file nhess-21-1495-2021-supplement-title-page.pdf › nhess-21-1495-2021-supplement-title-page.pdf]

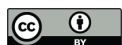

*Supplement of*

## **HazMapper: a global open-source natural hazard mapping application in Google Earth Engine**

**Corey M. Scheip and Karl W. Wegmann**

*Correspondence to:* Corey M. Scheip ([cmscheip@ncsu.edu](mailto:cmscheip@ncsu.edu))

- [nhess-21-1495-2021-supplement-title-page.pdf](#)
- [HazMapper\\_Mass\\_Wasting\\_Kenya\\_2019\\_Example.kmz](#)
- [ScheipWegmann\\_HazMapper\\_Supplement.pdf](#)

The copyright of individual parts of the supplement might differ from the article licence.
